# Supplementary material for: Estimating parameters in a sea ice model using an ensemble Kalman filter
Source: Copernicus journal article supplement (doi:10.5194/tc-15-1277-2021), 2021-03-11
Supplement: Supplementary file 1 [file tc-15-1277-2021-supplement.pdf]

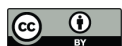

## *Supplement of*

# **Estimating parameters in a sea ice model using an ensemble Kalman filter**

**Yong-Fei Zhang et al.**

*Correspondence to:* Yong-Fei Zhang (yfzhang.nju@gmail.com)

The copyright of individual parts of the supplement might differ from the CC BY 4.0 License.

## Supplemental figures

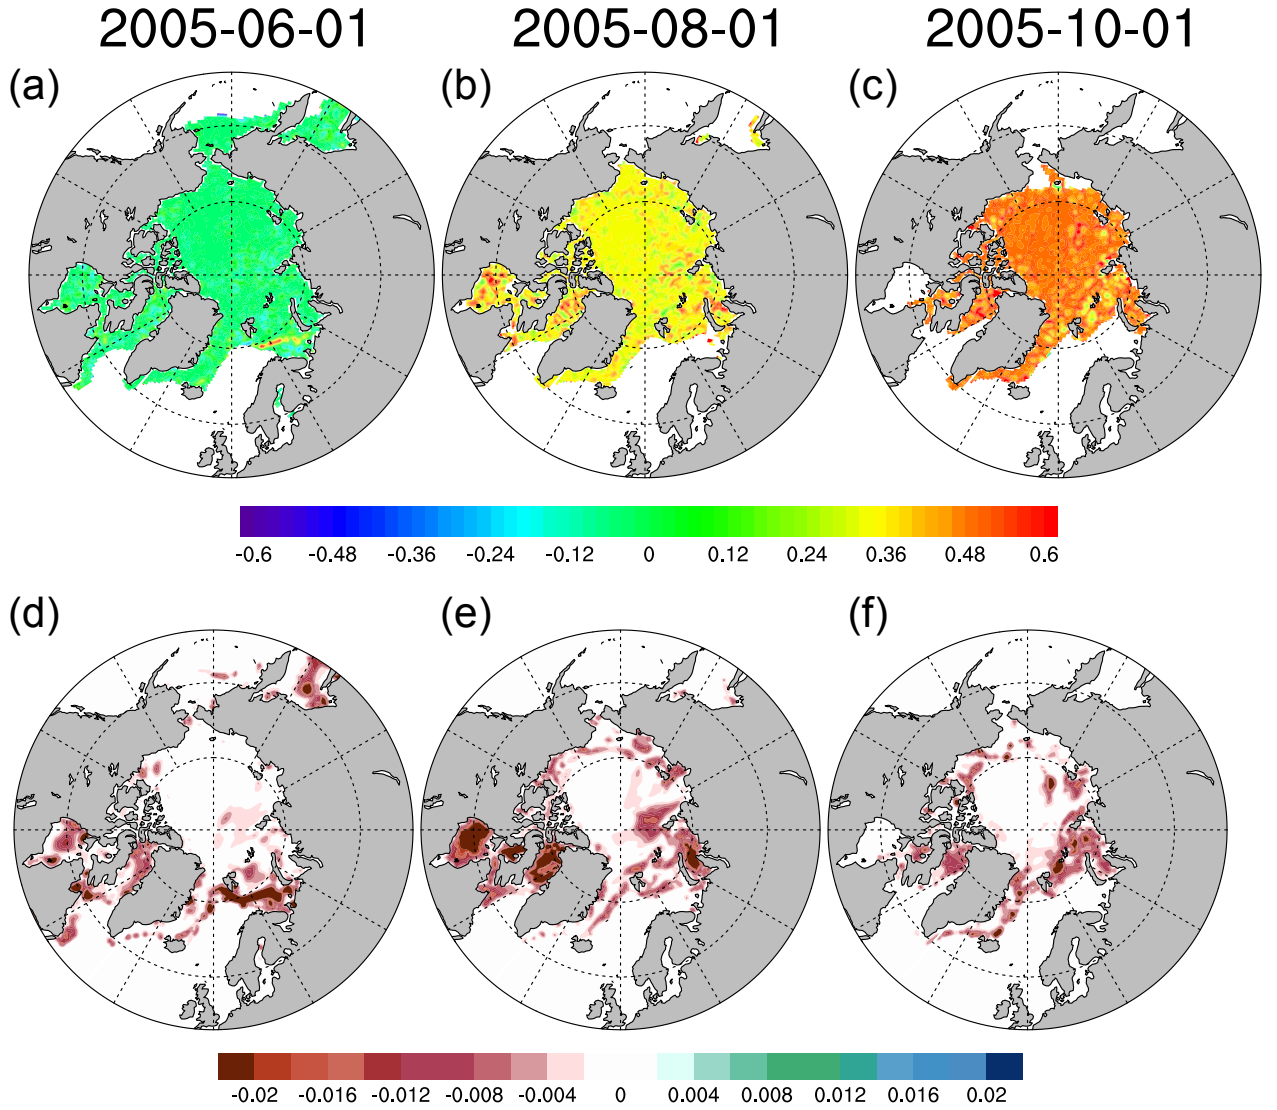

Figure S1. The posterior values of  $R_{\text{snow}}$  for the experiment DASitPEcst on (a) 2005-06-01, (b) 2005-08-01, and (c) 2005-10-01, and the differences between the ensemble spread of posterior  $R_{\text{snow}}$  and that of prior  $R_{\text{snow}}$  (the posterior minus prior) for the experiment DASitPEcst on (d) 2005-06-01, (e) 2005-08-01, and (f) 2005-10-01.
